# Supplementary material
Source: PubMed Central journal article supplement (PMC8795245)

## Supplement 1

**A. Cochrane Risk of Bias Assessment for Randomized Trials.** Each column indicates a potential source of bias. We assessed each randomized control trial for these potential sources of biases using the Cochrane Risk of Bias Assessment Tools and assigned each study a score of “low”, “some concerns”, or “high” risk of bias based on the criteria established by the assessment tool. Low risk of bias - the study is low risk for all domains. Some concern for bias = some concerns for bias in at least one domain, and not high risk in any domain. High risk of bias = high risk of bias in at least one domain or some concern for bias in multiple domains.<sup>27</sup>

| <i>Author/Year</i>            | <i>Randomization Process</i> | <i>Effect of Assignment to Intervention</i> | <i>Missing Outcome Data</i> | <i>Measurement of the Outcome</i> | <i>Selection of Reported Result</i> | <i>Overall Risk of Bias</i> |
|-------------------------------|------------------------------|---------------------------------------------|-----------------------------|-----------------------------------|-------------------------------------|-----------------------------|
| <i>Austin et al. 2012</i>     | Low                          | Some concerns                               | Low                         | low                               | Low                                 | Some concerns               |
| <i>Pozehl et al. 2007</i>     | Some concerns                | High                                        | Low                         | Some concerns                     | low                                 | High                        |
| <i>Seifi et al. 2018</i>      | Low                          | Some concerns                               | Low                         | Low                               | Low                                 | Some concerns               |
| <i>Simth-Love et al. 2019</i> | Some concerns                | Some concerns                               | Low                         | Some concerns                     | Low                                 | High                        |
| <i>Wang et al. 2016</i>       | Low                          | Some concerns                               | Low                         | Low                               | Low                                 | Some concerns               |

**B. Level of Evidence and Quality Appraisal.** The x-axis is the level and quality of evidence grade. The y-axis is the number of articles with that level of evidence or quality grade.

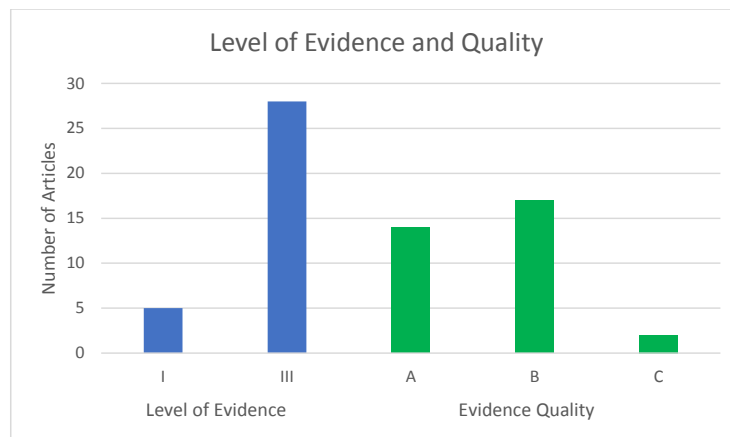

Supplement: NIHMS1728506-supplement-1.pdf [file NIHMS1728506-supplement-1.pdf]
